# Supplementary material for: Cardiac Rehabilitation Models around the Globe
Source: J Clin Med. 2018 Sep 7;7(9):260. doi: 10.3390/jcm7090260 (PMC6162832; doi:10.3390/jcm7090260)
Supplement: Supplementary file 1 [file jcm-07-00260-s001.pdf]

**Figure S1: Forms of Communication in Home-Based Programs and Their Frequency of Use in the African region (N=1)**

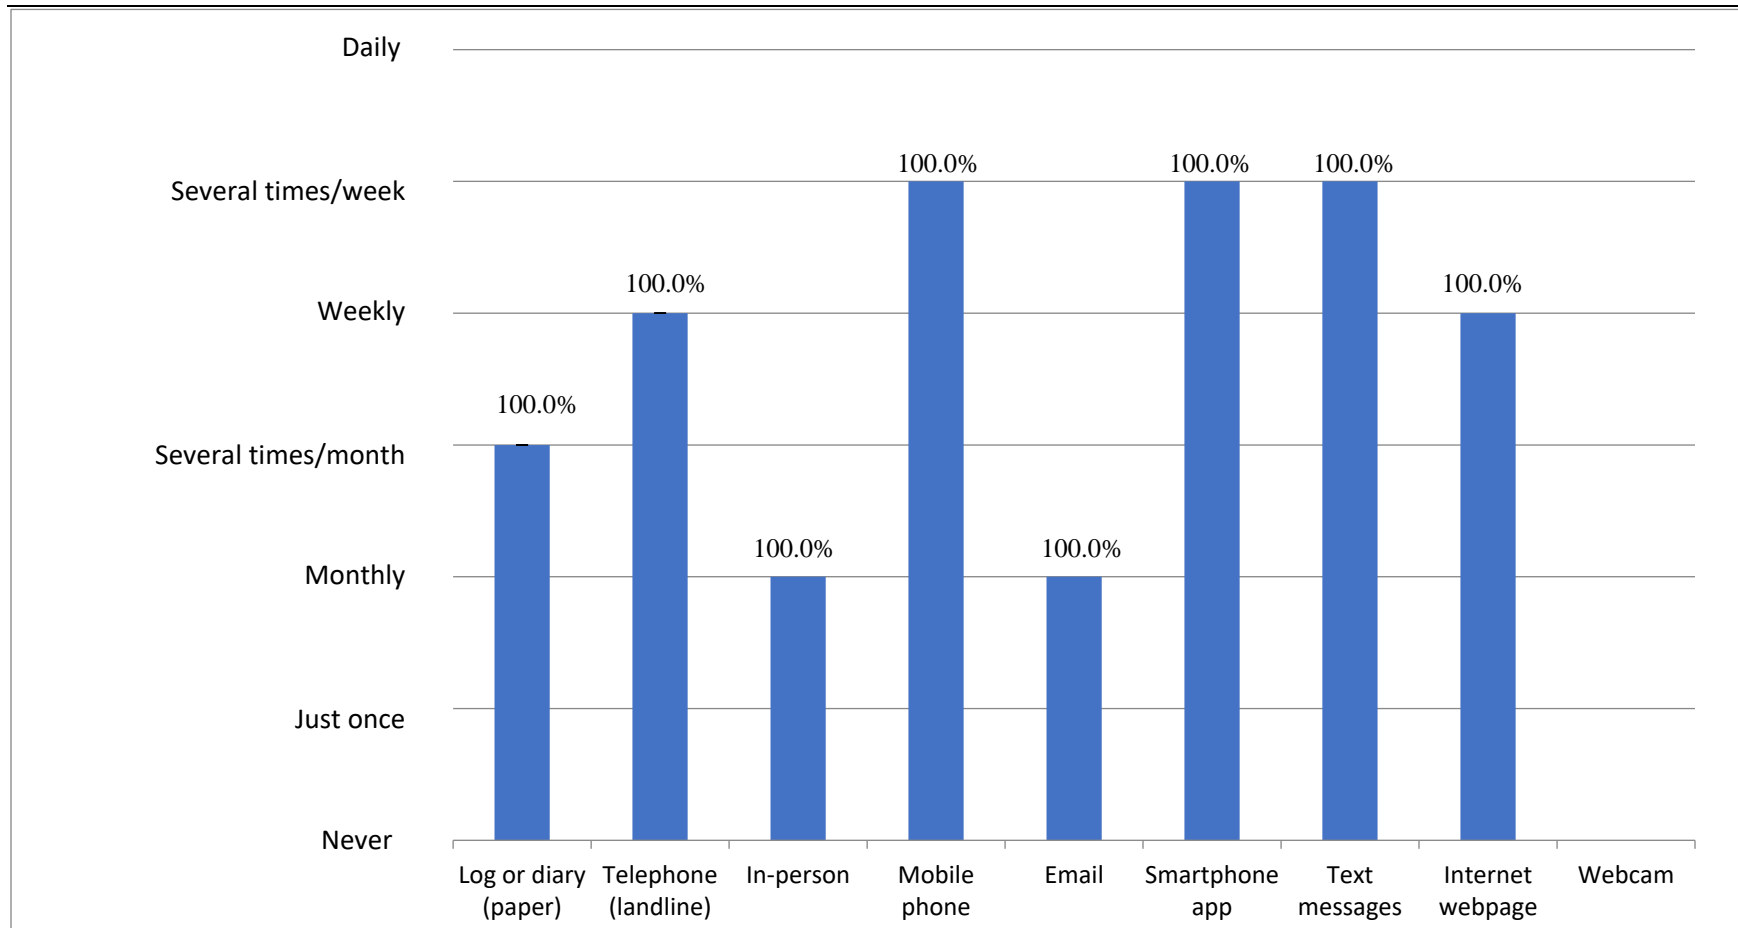

\*no whiskers because only one respondent.

The percentages reflect the number of home-based programs that use this form of communication.

**Figure S2 : Forms of Communication in Home-Based Programs and Their Frequency of Use in the Americas (N=37)**

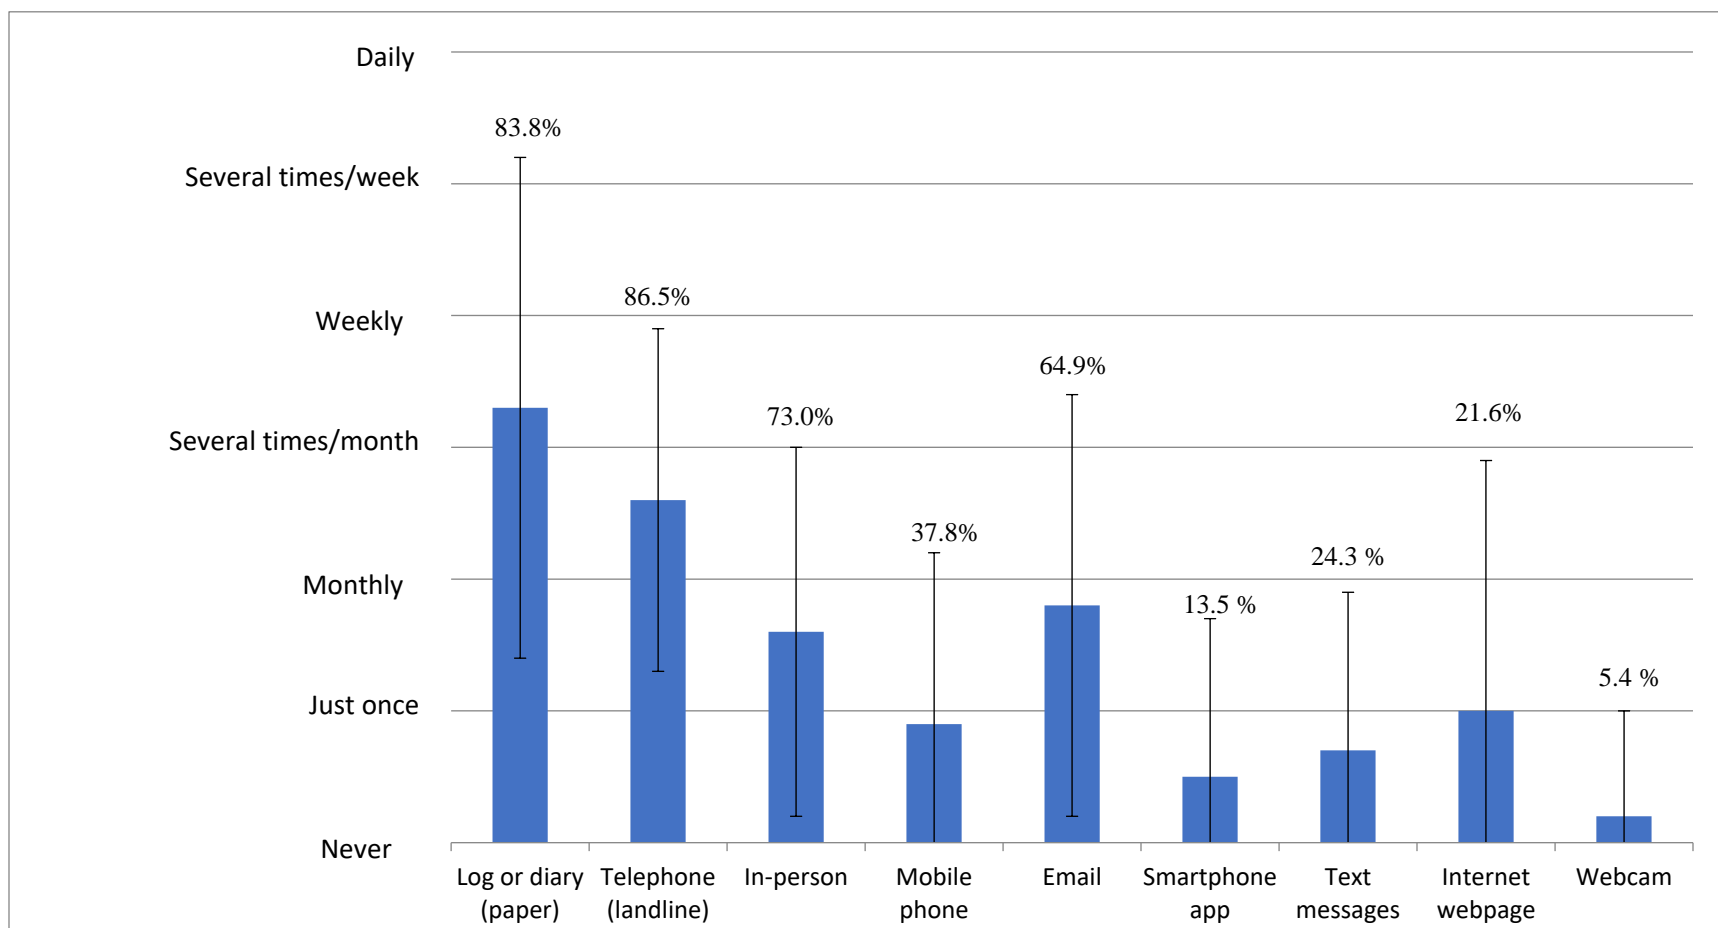

\*whiskers represent standard deviations of each form of communication.

The percentages reflect the number of home-based programs that use this form of communication.

**Figure S3: Forms of Communication in Home-Based Programs and Their Frequency of Use in the Eastern Mediterranean Region (N=4)**

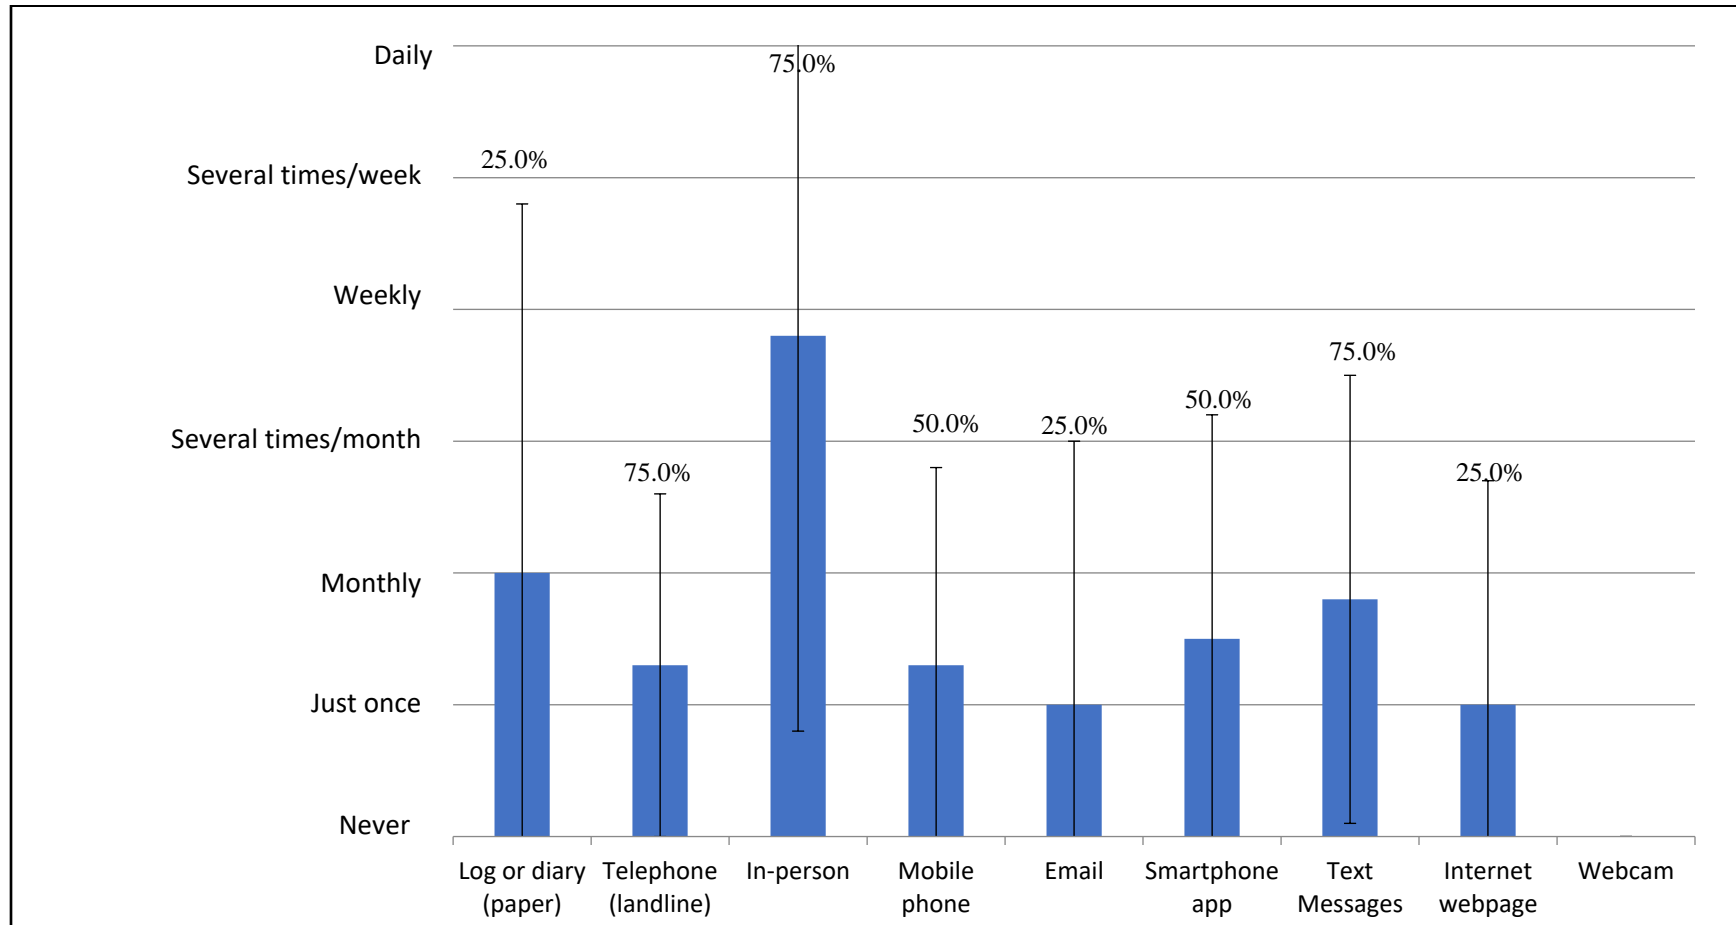

\*whiskers represent standard deviations of each form of communication  
The percentages reflect the number of home-based programs that use this form of communication.

**Figure S4: Forms of Communication in Home-Based Programs and Their Frequency of Use in Europe (N=41)**

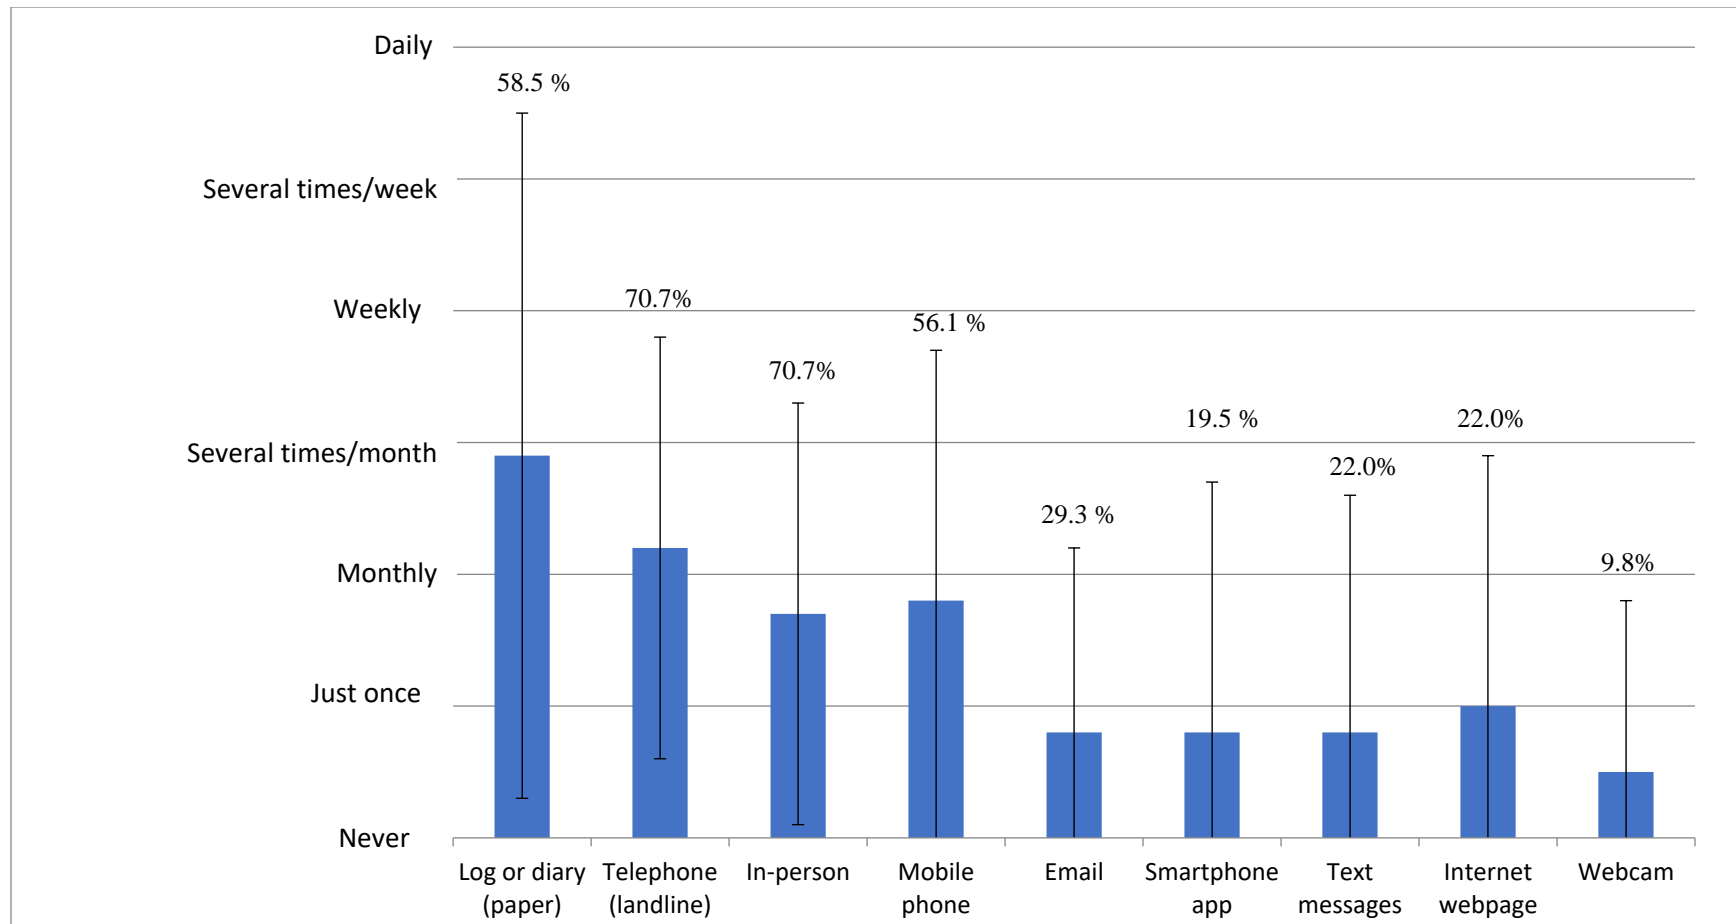

\*whiskers represent standard deviations of each form of communication.

The percentages reflect the number of home-based programs that use this form of communication.

**Figure S5: Forms of Communication in Home-Based Programs and Their Frequency of Use in the South-East Asia Region (N=2)**

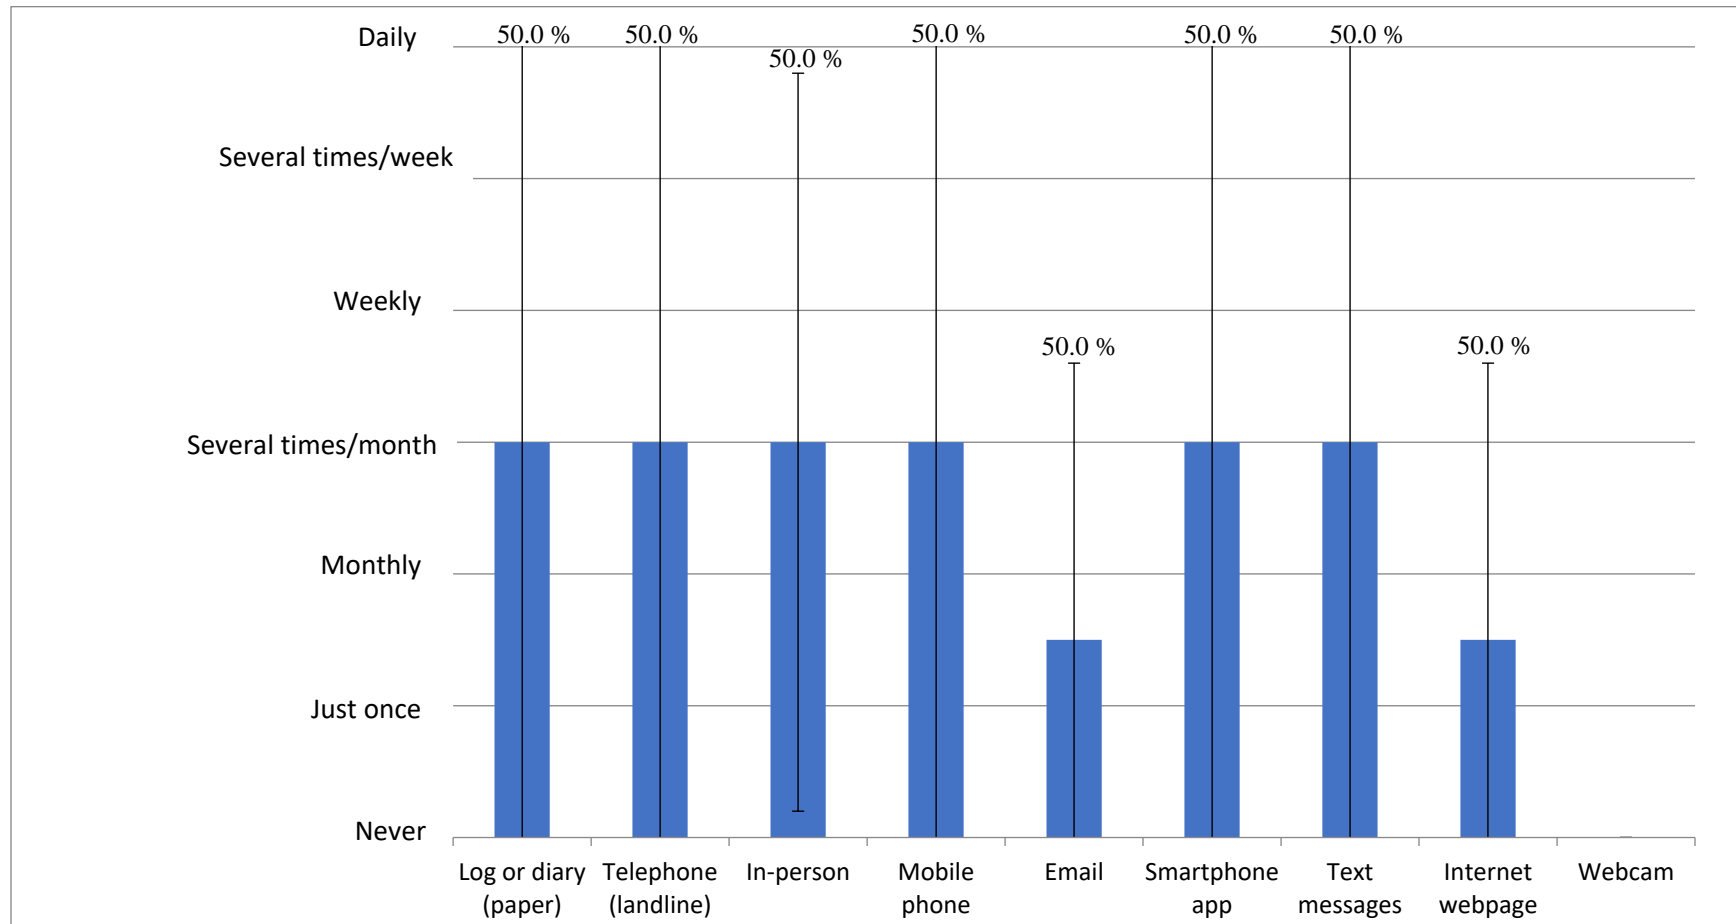

\*whiskers represent standard deviations of each form of communication.

The percentages reflect the number of home-based programs that use this form of communication.

**Figure S6: Forms of Communication in Home-Based Programs and Their Frequency of Use in the Western Pacific region (N=39)**

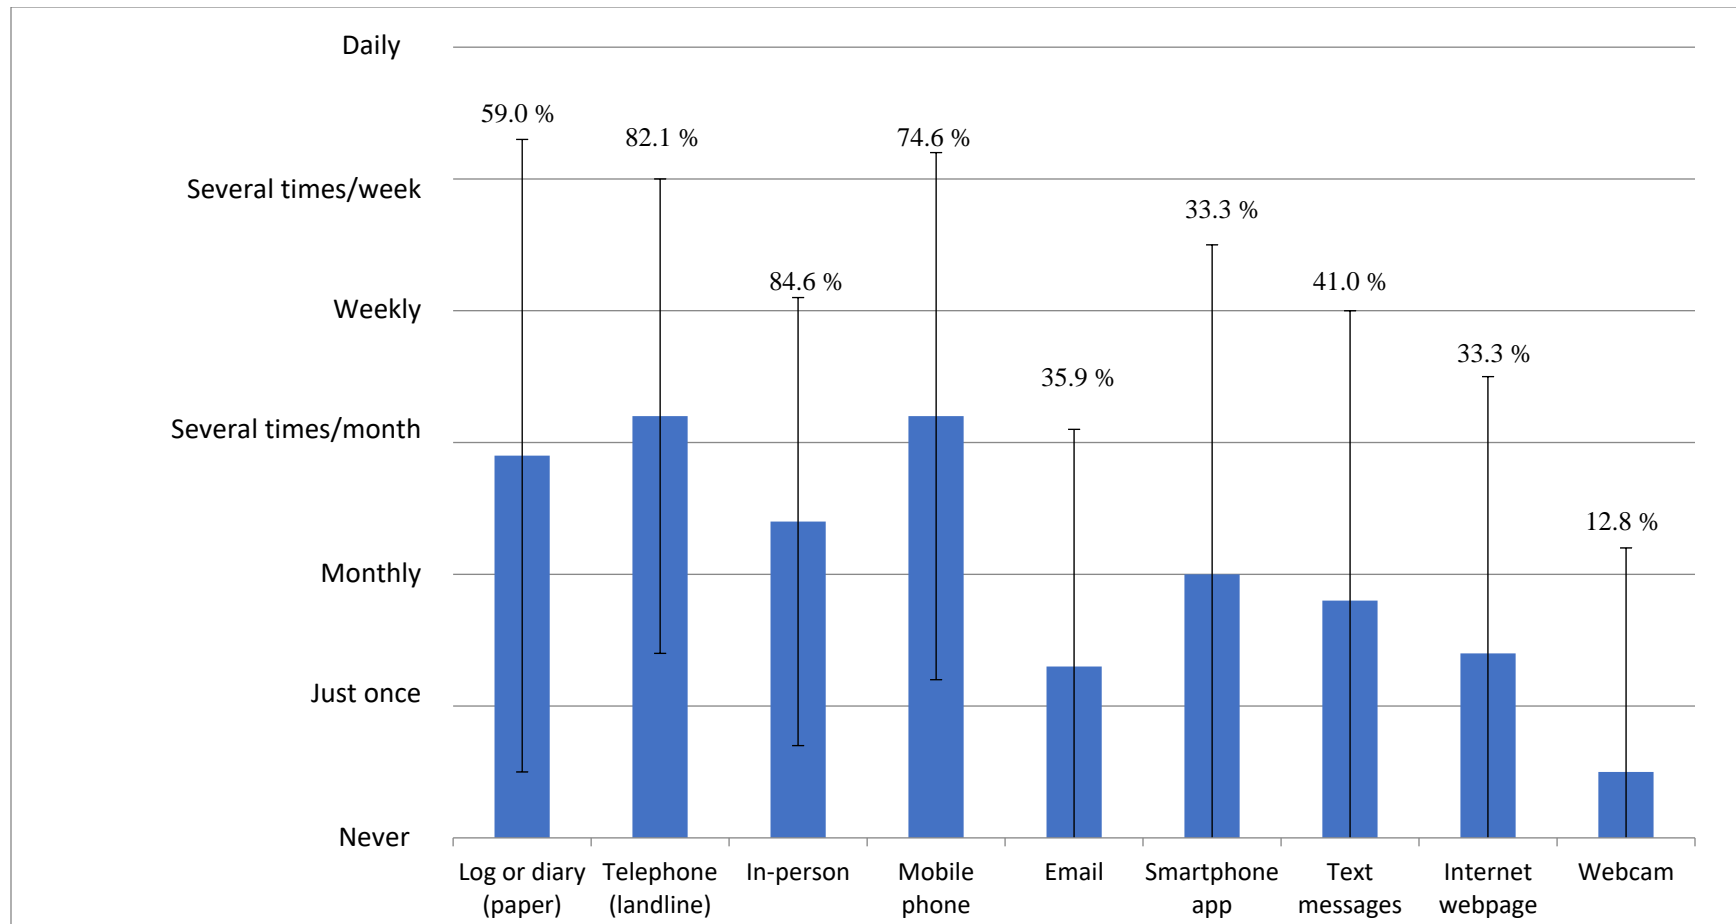

\*whiskers represent standard deviations of each form of communication.  
The percentages reflect the number of home-based programs that use this form of communication.

**Table S1: Delivery of alternative cardiac rehabilitation models by country**

| World Health Organization Region | n  | Offers Supervised<br>CR | Offers Home-Based<br>CR | Proportion<br>Pts Served (%) | Home-based<br>duration<br>(wks) | Offers<br>Community-<br>Based CR | Alt. Models<br>Reimbursed |
|----------------------------------|----|-------------------------|-------------------------|------------------------------|---------------------------------|----------------------------------|---------------------------|
| Country                          |    |                         |                         |                              |                                 |                                  |                           |
| African                          |    |                         |                         |                              |                                 |                                  |                           |
| Algeria                          | 1  | -                       | 1 (100.0%)              | -                            | -                               | 1 (100.0%)                       | -                         |
| Kenya                            | 1  | 1 (100.0%)              | -                       | -                            | -                               | -                                | 0 (0.0%)                  |
| Mauritius                        | 1  | 1 (100.0%)              | -                       | -                            | -                               | -                                | 0 (0.0%)                  |
| Nigeria                          | 1  | 1 (100.0%)              | -                       | -                            | -                               | -                                | 0 (0.0%)                  |
| South Africa                     | 14 | 13 (92.9%)              | 1 (7.1%)                | 20.0±0.0                     | 16.0±0.0                        | 0 (0.0%)                         | 2 (14.3%)                 |
| Regional Average                 | 18 | 16 (88.9%)              | 2 (11.1%)               | 20.0±0.0                     | 16.0±0.0                        | 1 (5.6%)                         | 2 (11.1%)                 |
| Americas                         |    |                         |                         |                              |                                 |                                  |                           |
| Argentina                        | 3  | 3 (100.0%)              | 0 (0.0%)                | -                            | -                               | 0 (0.0%)                         | 0 (0.0%)                  |
| Barbados                         | 1  | 1 (100.0%)              | -                       | -                            | -                               | -                                | 0 (0.0%)                  |
| Bermuda                          | 1  | 1 (100.0%)              | 1 (100.0%)              | 10.0±0.0                     | 24.0±0.0                        | 0 (0.0%)                         | 1 (100.0%)                |
| Brazil                           | 30 | 23 (76.7%)              | 5 (16.7%)               | 23.3±23.1                    | 38.0±13.1                       | 1 (3.3%)                         | 2 (6.7%)                  |
| Canada                           | 57 | 46 (80.7%)              | 27 (47.4%)              | 14.8±17.8                    | 21.8±16.5                       | 13 (22.8%)                       | 14 (24.6%)                |
| Chile                            | 1  | 1 (100.0%)              | 0 (0.0%)                | -                            | -                               | 0 (0.0%)                         | 0 (0.0%)                  |
| Colombia                         | 48 | 48 (100.0%)             | -                       | -                            | -                               | -                                | 0 (0.0%)                  |
| Costa Rica                       | 6  | 6 (100.0%)              | 1 (16.7%)               | 30.0±0.0                     | 12.0±0.0                        | 2 (33.3%)                        | 2 (33.3%)                 |
| Cuba                             | 8  | 7 (87.5%)               | 2 (25.0%)               | 35.0±7.1                     | 36.0±0.0                        | 5 (83.3%)                        | 6 (75.0%)                 |
| Curacao                          | 1  | 1 (100.0%)              | -                       | -                            | -                               | -                                | 0 (0.0%)                  |
| Dominican Republic               | 1  | 1 (100.0%)              | -                       | -                            | -                               | -                                | 0 (0.0%)                  |
| Ecuador                          | 2  | 2 (100.0%)              | -                       | -                            | -                               | -                                | 0 (0.0%)                  |
| Guatemala                        | 2  | 2 (100.0%)              | 1 (50.0%)               | -                            | 12.0±0.0                        | 0 (0.0%)                         | 1 (50.0%)                 |
| Honduras                         | 1  | 1 (100.0%)              | -                       | -                            | -                               | -                                | 0 (0.0%)                  |

|                              |            |                    |                   |                  |                  |                  |                   |
|------------------------------|------------|--------------------|-------------------|------------------|------------------|------------------|-------------------|
| Jamaica                      | 1          | 1 (100.0%)         | 0 (0.0%)          | -                | -                | 0 (0.0%)         | 1 (100.0%)        |
| Mexico                       | 9          | 9 (100.0%)         | 1 (11.1%)         | 50.0±0.0         | 8.0±0.0          | 0 (0.0%)         | 1 (11.1%)         |
| Panama                       | 1          | 1 (100.0%)         | -                 | -                | -                | -                | 0 (0.0%)          |
| Paraguay                     | 3          | 3 (100.0%)         | 2 (66.7%)         | 40.0±0.0         | 36.0±0.0         | 0 (0.0%)         | 1 (33.3%)         |
| Peru                         | 7          | 7 (100.0%)         | 0 (0.0%)          | -                | -                | 0 (0.0%)         | 0 (0.0%)          |
| United States of America     | 65         | 55 (84.6%)         | 0 (0.0%)          | -                | -                | 0 (0.0%)         | 1 (1.5%)          |
| Uruguay                      | 5          | 5 (100.0%)         | -                 | -                | -                | -                | 0 (0.0%)          |
| Venezuela                    | 8          | 7 (87.5%)          | 1 (12.5%)         | 9.0±0.0          | 12.0±0.0         | 0 (0.0%)         | 0 (0.0%)          |
| <i>Regional Average</i>      | <i>261</i> | <i>231 (88.5%)</i> | <i>41 (15.7%)</i> | <i>18.7±18.3</i> | <i>23.2±15.7</i> | <i>21 (8.0%)</i> | <i>30 (11.5%)</i> |
| <b>Eastern Mediterranean</b> |            |                    |                   |                  |                  |                  |                   |
| Afghanistan                  | 1          | 0 (0.0%)           | -                 | -                | -                | -                | 0 (0.0%)          |
| Bahrain                      | 1          | 1 (100.0%)         | -                 | -                | -                | -                | 0 (0.0%)          |
| Egypt                        | 2          | 0 (0.0%)           | -                 | -                | -                | -                | 0 (0.0%)          |
| Iran                         | 14         | 12 (85.7%)         | 5 (35.7%)         | 12.5±15.7        | 9.8±3.2          | 1 (7.1%)         | 3 (21.4%)         |
| Lebanon                      | 1          | 1 (100.0%)         | -                 | -                | -                | -                | 0 (0.0%)          |
| Morocco                      | 1          | 0 (0.0%)           | -                 | -                | -                | -                | 1 (100.0%)        |
| Pakistan                     | 2          | 2 (100.0%)         | 0 (0.0%)          | -                | -                | 0 (0.0%)         | 0 (0.0%)          |
| Qatar                        | 1          | 1 (100.0%)         | -                 | -                | -                | -                | 0 (0.0%)          |
| Tunisia                      | 1          | 1 (100.0%)         | -                 | -                | -                | -                | 0 (0.0%)          |
| <i>Regional Average</i>      | <i>24</i>  | <i>18 (75.0%)</i>  | <i>5 (20.8%)</i>  | <i>12.5±15.7</i> | <i>9.8±3.2</i>   | <i>1 (4.2%)</i>  | <i>4 (16.7%)</i>  |
| <b>Europe</b>                |            |                    |                   |                  |                  |                  |                   |
| Austria                      | 5          | 5 (100.0%)         | 0 (0.0%)          | -                | -                | 1 (20.0%)        | 1 (20.0%)         |
| Belarus                      | 1          | 1 (100.0%)         | -                 | -                | -                | -                | 0 (0.0%)          |
| Belgium                      | 9          | 7 (77.8%)          | 1 (11.1%)         | 2.0±0.0          | 12.0±0.0         | 2 (22.2%)        | 2 (22.2%)         |
| Bosnia and Herzegovina       | 1          | 1 (100.0%)         | -                 | -                | -                | -                | 0 (0.0%)          |
| Bulgaria                     | 1          | 1 (100.0%)         | -                 | -                | -                | -                | 0 (0.0%)          |

|                     |    |             |            |           |           |            |            |
|---------------------|----|-------------|------------|-----------|-----------|------------|------------|
| Croatia             | 3  | 2 (66.7%)   | -          | -         | -         | -          | 1 (33.3%)  |
| Czech Republic      | 6  | 4 (66.6%)   | 3 (60.0%)  | -         | 11.0±1.4  | 0 (0.0%)   | 0 (0.0%)   |
| Denmark             | 8  | 6 (75.0%)   | 1 (12.5%)  | 10.0±0.0  | 12.0±0.0  | 0 (0.0%)   | 3 (60.0%)  |
| England             | 57 | 43 (75.4%)  | 17 (29.8%) | 7.7±10.1  | 12.4±14.7 | 17 (29.8%) | 13 (22.8%) |
| Estonia             | 2  | 1 (50.0%)   | 2 (100.0%) | 5.0±0.0   | 12.0±0.0  | 0 (0.0%)   | 0 (0.0%)   |
| Finland             | 11 | 3 (27.3%)   | -          | -         | -         | -          | 3 (27.3%)  |
| France              | 16 | 11 (68.8%)  | 0 (0.0%)   | -         | -         | 1 (6.3%)   | 0 (0.0%)   |
| Georgia             | 13 | 6 (46.2%)   | 1 (7.7%)   | 25.0±0.0  | 10.0±0.0  | 1 (7.7%)   | 1 (7.7%)   |
| Germany             | 34 | 25 (73.5%)  | 0 (0.0%)   | -         | -         | 1 (2.9%)   | 6 (17.6%)  |
| Greece              | 4  | 4 (100.0%)  | -          | -         | -         | -          | 0 (0.0%)   |
| Hungary             | 20 | 15 (75.0%)  | 1 (5.0%)   | 10.0±0.0  | 6.0±0.0   | 2 (10.0%)  | 1 (5.0%)   |
| Iceland             | 4  | 3 (75.0%)   | 0 (0.0%)   | -         | -         | 0 (0.0%)   | 1 (25.0%)  |
| Ireland             | 7  | 5 (71.4%)   | 2 (28.6%)  | -         | -         | 1 (14.3%)  | 2 (28.6%)  |
| Israel              | 6  | 5 (83.3%)   | -          | -         | -         | -          | 0 (0.0%)   |
| Italy               | 70 | 51 (72.9%)  | 3 (4.3%)   | 18.3±12.6 | 6.0±0.0   | 6 (8.6%)   | 6 (8.6%)   |
| Kazakhstan          | 1  | -           | 1 (100.0%) | -         | -         | 1 (100.0%) | -          |
| Latvia              | 1  | 0 (0.0%)    | -          | -         | -         | -          | 0 (0.0%)   |
| Lithuania           | 9  | 4 (44.4%)   | -          | -         | -         | -          | 0 (0.0%)   |
| Macedonia           | 1  | 0 (0.0%)    | -          | -         | -         | -          | 0 (0.0%)   |
| Malta               | 1  | 1 (100.0%)  | -          | -         | -         | -          | 0 (0.0%)   |
| Netherlands         | 29 | 11 (37.9%)  | 2 (6.9%)   | 15.0±14.1 | 26.0±0.0  | 1 (3.4%)   | 3 (10.3%)  |
| Northern Ireland    | 10 | 10 (100.0%) | 4 (40.0%)  | -         | -         | 0 (0.0%)   | 0 (0.0%)   |
| Poland              | 21 | 10 (47.6%)  | 0 (0.0%)   | -         | -         | 0 (0.0%)   | 2 (9.5%)   |
| Portugal            | 21 | 17 (81.0%)  | 1 (4.8%)   | 1.0±0.0   | -         | 0 (0.0%)   | 0 (0.0%)   |
| Republic of Moldova | 1  | 0 (0.0%)    | 1 (100.0%) | 10.0±0.0  | 12.0±0.0  | 0 (0.0%)   | 0 (0.0%)   |
| Romania             | 2  | 2 (100.0%)  | -          | -         | -         | -          | 0 (0.0%)   |

|                         |            |                    |                   |                  |                 |                   |                   |
|-------------------------|------------|--------------------|-------------------|------------------|-----------------|-------------------|-------------------|
| Russian Federation      | 3          | 1 (33.3%)          | -                 | -                | -               | -                 | 1 (33.3%)         |
| Scotland                | 24         | 19 (79.2%)         | 12 (50.0%)        | 17.1±9.9         | 9.2±2.3         | 8 (33.3%)         | 1 (4.2%)          |
| Serbia                  | 2          | 1 (50.0%)          | -                 | -                | -               | -                 | 0 (0.0%)          |
| Slovak Republic         | 1          | 1 (100.0%)         | -                 | -                | -               | -                 | 0 (0.0%)          |
| Slovenia                | 2          | 2 (100.0%)         | -                 | -                | -               | -                 | 0 (0.0%)          |
| Spain                   | 47         | 41 (87.2%)         | 6 (12.8%)         | 24.0±17.8        | 8.0±0.0         | 4 (8.5%)          | 8 (17.0%)         |
| Sweden                  | 1          | 1 (100.0%)         | 0 (0.0%)          | -                | -               | 0 (0.0%)          | 0 (0.0%)          |
| Switzerland             | 4          | 2 (50.0%)          | -                 | -                | -               | -                 | 0 (0.0%)          |
| Turkey                  | 9          | 7 (77.8%)          | -                 | -                | -               | -                 | 0 (0.0%)          |
| Wales                   | 16         | 14 (87.5%)         | 4 (25.0%)         | 5.5±6.4          | 12.0±5.7        | 8 (50.0%)         | 1 (6.3%)          |
| <i>Regional Average</i> | <i>484</i> | <i>343 (70.9%)</i> | <i>62 (12.8%)</i> | <i>12.9±11.8</i> | <i>10.8±7.9</i> | <i>54 (11.2%)</i> | <i>56 (11.6%)</i> |
| <b>South-East Asia</b>  |            |                    |                   |                  |                 |                   |                   |
| Bangladesh              | 1          | 1 (100.0%)         | 0 (0.0%)          | -                | -               | 0 (0.0%)          | 0 (0.0%)          |
| India                   | 18         | 13 (72.2%)         | 2 (11.1%)         | 55.0±35.4        | -               | 0 (0.0%)          | 1 (5.6%)          |
| Indonesia               | 10         | 9 (90.0%)          | 0 (0.0%)          | -                | -               | 1 (10.0%)         | 0 (0.0%)          |
| Nepal                   | 1          | 1 (100.0%)         | -                 | -                | -               | -                 | 0 (0.0%)          |
| Sri Lanka               | 2          | 2 (100.0%)         | -                 | -                | -               | -                 | 0 (0.0%)          |
| <i>Regional Average</i> | <i>32</i>  | <i>26 (81.3%)</i>  | <i>2 (6.3%)</i>   | <i>55.0±35.4</i> | <i>-</i>        | <i>1 (3.1%)</i>   | <i>1 (3.1%)</i>   |
| <b>Western-Pacific</b>  |            |                    |                   |                  |                 |                   |                   |
| Australia               | 85         | 71 (83.5%)         | 22 (25.9%)        | 16.7±13.8        | 8.4±9.2         | 10 (11.8%)        | 19 (22.3%)        |
| Brunei Darussalam       | 2          | 2 (100.0%)         | -                 | -                | -               | -                 | 0 (0.0%)          |
| China                   | 83         | 70 (84.3%)         | 14 (16.9%)        | 57.7±30.1        | 7.9±7.2         | 6 (7.2%)          | 4 (4.8%)          |
| Japan                   | 9          | 6 (66.7%)          | 1 (11.1%)         | 10.0±0.0         | 4.0±0.0         | 3 (33.3%)         | 3(33.3%)          |
| Malaysia                | 4          | 3 (75.0%)          | 2 (50.0%)         | 20.0±0.0         | 8.0±5.7         | 1 (25.0%)         | 0 (0.0%)          |
| Mongolia                | 1          | 1 (100.0%)         | -                 | -                | -               | -                 | -                 |

|                         |             |                    |                    |                  |                  |                    |                    |
|-------------------------|-------------|--------------------|--------------------|------------------|------------------|--------------------|--------------------|
| New Zealand             | 27          | 22 (81.5%)         | 7 (25.9%)          | 10.0±0.0         | 10.0±12.1        | 11 (40.7%)         | 6 (22.2%)          |
| Philippines             | 10          | 10 (100.0%)        | 1 (10.0%)          | 15.0±0.0         | -                | 0 (0.0%)           | 0 (0.0%)           |
| Singapore               | 7           | 7 (100.0%)         | -                  | -                | -                | -                  | 1 (14.3%)          |
| South Korea             | 12          | 12 (100.0%)        | 5 (41.7%)          | 60.0±35.2        | 10.0±4.0         | 0 (0.0%)           | 4 (25.0%)          |
| Taiwan                  | 23          | 17 (73.9%)         | 2 (8.7%)           | 27.5±31.8        | 16.0±5.7         | 0 (0.0%)           | 0 (0.0%)           |
| <i>Regional Average</i> | 263         | 221 (84.0%)        | 54 (20.5%)         | 35.6±30.8        | 9.1±7.2          | 31 (11.8%)         | 37 (14.1%)         |
| <b>Global Average</b>   | <b>1082</b> | <b>855 (79.0%)</b> | <b>166 (15.3%)</b> | <b>21.4±22.8</b> | <b>14.5±12.4</b> | <b>109 (10.1%)</b> | <b>130 (12.0%)</b> |

- no response

Abbreviations: pts=patients; wks=weeks; Alt=alternative.

Acronyms: CR=cardiac rehabilitation

**Table S2: Patient Education in Supervised Cardiac Rehabilitation by country**

| World Health Organization Region | n          | Number education sessions offered to patients per program | Education session duration (min.) | Total Education Dose (min.) |
|----------------------------------|------------|-----------------------------------------------------------|-----------------------------------|-----------------------------|
| Country                          |            |                                                           |                                   |                             |
| Mean $\pm$ std. deviation        |            |                                                           |                                   |                             |
| <b>African</b>                   |            |                                                           |                                   |                             |
| Algeria                          | 1          | -                                                         | -                                 |                             |
| Kenya                            | 1          | 2.0 $\pm$ 0.0                                             | 20.0 $\pm$ 0.0                    | 40.0                        |
| Mauritius                        | 1          | -                                                         | 35.0 $\pm$ 0.0                    | -                           |
| Nigeria                          | 1          | 12.0 $\pm$ 0.0                                            | 45.0 $\pm$ 0.0                    | 540.0                       |
| South Africa                     | 14         | 13.0 $\pm$ 12.0                                           | 30.5 $\pm$ 16.9                   | 396.5                       |
| <i>Regional Mean</i>             | <i>18</i>  | <i>12.1<math>\pm</math>11.3</i>                           | <i>31.1<math>\pm</math>15.7</i>   | <i>376.3</i>                |
| <b>Americas</b>                  |            |                                                           |                                   |                             |
| Argentina                        | 3          | 3.0 $\pm$ 0.0                                             | 52.5 $\pm$ 10.6                   | 157.6                       |
| Barbados                         | 1          | 2.0 $\pm$ 0.0                                             | 15.0 $\pm$ 0.0                    | 30.0                        |
| Bermuda                          | 1          | 7.0 $\pm$ 0.0                                             | 120.0 $\pm$ 0.0                   | 840.0                       |
| Brazil                           | 30         | 6.0 $\pm$ 10.5                                            | 45.1 $\pm$ 29.6                   | 270.6                       |
| Canada                           | 57         | 11.6 $\pm$ 11.6                                           | 62.6 $\pm$ 30.8                   |                             |
| Chile                            | 1          | 4.0 $\pm$ 0.0                                             | 60.0 $\pm$ 0.0                    | 240.0                       |
| Colombia                         | 48         | 6.0 $\pm$ 6.7                                             | 49.1 $\pm$ 31.3                   | 294.6                       |
| Costa Rica                       | 6          | 11.7 $\pm$ 7.1                                            | 35.0 $\pm$ 18.2                   | 409.5                       |
| Cuba                             | 8          | 12.0 $\pm$ 10.2                                           | 37.5 $\pm$ 17.3                   | 450.0                       |
| Curacao                          | 1          | -                                                         | 30.0 $\pm$ 0.0                    | -                           |
| Dominican Republic               | 1          | 12.0 $\pm$ 0.0                                            | 30.0 $\pm$ 0.0                    | 360.0                       |
| Ecuador                          | 2          | 10.0 $\pm$ 7.1                                            | 34.0 $\pm$ 15.6                   | 340.0                       |
| Guatemala                        | 2          | 11.0 $\pm$ 1.4                                            | 40.0 $\pm$ 28.3                   | 440.0                       |
| Honduras                         | 1          | 2.0 $\pm$ 0.0                                             | 30.0 $\pm$ 0.0                    | 60.0                        |
| Jamaica                          | 1          | -                                                         | -                                 | -                           |
| Mexico                           | 9          | 8.1 $\pm$ 8.1                                             | 34.4 $\pm$ 20.5                   | 278.6                       |
| Panama                           | 1          | -                                                         | 0.0 $\pm$ 0.0                     | -                           |
| Paraguay                         | 3          | 5.0 $\pm$ 0.0                                             | 15.0 $\pm$ 5.0                    | 75.0                        |
| Peru                             | 7          | 12.8 $\pm$ 6.2                                            | 75.4 $\pm$ 34.9                   | 965.1                       |
| United States of America         | 65         | 14.6 $\pm$ 12.2                                           | 42.1 $\pm$ 29.4                   | 614.7                       |
| Uruguay                          | 5          | 3.7 $\pm$ 0.6                                             | 44.0 $\pm$ 31.3                   | 162.8                       |
| Venezuela                        | 8          | 10.4 $\pm$ 3.4                                            | 46.9 $\pm$ 12.5                   | 487.8                       |
| <i>Regional Mean</i>             | <i>261</i> | <i>9.9<math>\pm</math>11.1</i>                            | <i>48.4<math>\pm</math>30.2</i>   | <i>479.2</i>                |
| <b>Eastern Mediterranean</b>     |            |                                                           |                                   |                             |

|                        |           |                |                  |              |
|------------------------|-----------|----------------|------------------|--------------|
| Afghanistan            | 1         | -              | 120.0±0.0        | -            |
| Bahrain                | 1         | 11.0±0.0       | 30.0±0.0         | 330.0        |
| Egypt                  | 2         | 1.0±0.0        | 15.0±0.0         | 15.0         |
| Iran                   | 14        | 6.0±5.5        | 40.4±20.9        | 240.0        |
| Lebanon                | 1         | 20.0±0.0       | 90.0±0.0         | 1800.0       |
| Morocco                | 1         | 20.0±0.0       | 45.0±0.0         | 900.0        |
| Pakistan               | 2         | 4.5±0.7        | 70.0±70.7        | 315.0        |
| Qatar                  | 1         | 3.0±0.0        | 30.0±0.0         | 90.0         |
| Tunisia                | 1         | 5.0±0.0        | 20.0±0.0         | 100.0        |
| <i>Regional Mean</i>   | <i>24</i> | <i>7.1±6.4</i> | <i>46.4±32.3</i> | <i>329.4</i> |
| <b>Europe</b>          |           |                |                  |              |
| Austria                | 5         | 36.8±62.2      | 68.8±44.2        | 2531.8       |
| Belarus                | 1         | -              | -                | -            |
| Belgium                | 9         | 10.7±15.3      | 98.6±28.5        | 1055.0       |
| Bosnia and Herzegovina | 1         | 1.0±0.0        | 45.0±0.0         | 45.0         |
| Bulgaria               | 1         | 2.0±0.0        | 10.0±0.0         | 20.0         |
| Croatia                | 3         | 12.3±4.6       | 43.3±2.9         | 532.6        |
| Czech Republic         | 6         | 4.2±4.6        | 22.0±22.6        | 92.4         |
| Denmark                | 8         | 6.4±4.0        | 111.0±77.7       | 710.4        |
| England                | 57        | 7.6±5.0        | 56.4±50.1        | 428.6        |
| Estonia                | 2         | 2.0±0.0        | 30.0±0.0         | 60.0         |
| Finland                | 11        | 18.0±18.4      | 82.5±21.2        | 1485.0       |
| France                 | 16        | 9.8±5.4        | 55.4±16.3        | 542.9        |
| Georgia                | 13        | 8.4±6.8        | 20.0±8.4         | 168.0        |
| Germany                | 34        | 20.6±30.7      | 54.5±41.0        | 1122.7       |
| Greece                 | 4         | 5.0±4.1        | 13.8±12.5        | 69.0         |
| Hungary                | 20        | 8.3±6.1        | 36.3±13.1        | 301.3        |
| Iceland                | 4         | 7.3±3.7        | 51.3±16.0        | 374.5        |
| Ireland                | 7         | 12.6±3.0       | 58.5±3.4         | 737.1        |
| Israel                 | 6         | 1.8±0.8        | 54.0±25.1        | 97.2         |
| Italy                  | 70        | 6.9±7.4        | 48.5±26.1        | 334.7        |
| Kazakhstan             | 1         | -              | -                | -            |
| Latvia                 | 1         | 3.0±0.0        | 30.0±0.0         | 90.0         |
| Lithuania              | 9         | 6.3±5.5        | 49.2±50.2        | 94.5         |
| Macedonia              | 1         | 2.5±0.0        | 15.0±0.0         | 37.5         |
| Malta                  | 1         | 5.0±0.0        | 60.0±0.0         | 300.0        |

|                        |            |                 |                  |              |
|------------------------|------------|-----------------|------------------|--------------|
| Netherlands            | 29         | 5.6±3.2         | 69.2±36.1        | 387.5        |
| Northern Ireland       | 10         | 8.1±2.3         | 43.0±8.6         | 348.3        |
| Poland                 | 21         | 5.0±4.1         | 36.0±11.3        | 180.0        |
| Portugal               | 21         | 13.7±11.5       | 56.1±21.2        | 768.6        |
| Republic of Moldova    | 1          | 10.0±0.0        | 30.0±0.0         | 300.0        |
| Romania                | 2          | 10.0±0.0        | 27.5±3.5         | 275.0        |
| Russian Federation     | 3          | 0.0±0.0         | 0.0±0.0          | -            |
| Scotland               | 24         | 6.3±3.3         | 42.0±17.3        | 894.6        |
| Serbia                 | 2          | 5.5±3.5         | 60.0±0.0         | 330.0        |
| Slovak Republic        | 1          | 2.0±0.0         | 45.0±0.0         | 90.0         |
| Slovenia               | 2          | 56.0±62.2       | 37.5±31.8        | 2100.0       |
| Spain                  | 47         | 9.5±7.2         | 51.2±15.3        | 486.4        |
| Sweden                 | 1          | -               | 60.0±0.0         | -            |
| Switzerland            | 4          | 12.0±0.0        | 45.0±0.0         | 540.0        |
| Turkey                 | 9          | 16.3±12.9       | 33.8±20.3        | 550.9        |
| Wales                  | 16         | 7.6±4.3         | 53.6±24.1        | 407.4        |
| <i>Regional Mean</i>   | <i>484</i> | <i>9.6±13.5</i> | <i>51.2±32.4</i> | <i>491.5</i> |
| <b>South-East Asia</b> |            |                 |                  |              |
| Bangladesh             | 1          | 5.0±0.0         | 20.0±0.0         | 100.0        |
| India                  | 18         | 3.9±3.0         | 24.3±11.3        | 94.7         |
| Indonesia              | 10         | 1.9±1.8         | 24.1±18.0        | 45.8         |
| Nepal                  | 1          | 6.0±0.0         | 60.0±0.0         | 360.0        |
| Sri Lanka              | 2          | 8.0±0.0         | 45.0±21.2        | 360.0        |
| <i>Regional Mean</i>   | <i>32</i>  | <i>3.5±2.9</i>  | <i>25.8±13.6</i> | <i>90.3</i>  |
| <b>Western Pacific</b> |            |                 |                  |              |
| Australia              | 85         | 7.8±3.6         | 54.2±15.0        | 422.8        |
| Brunei Darussalam      | 2          | 14.0±2.8        | 67.5±10.6        | 945.0        |
| China                  | 83         | 4.2±5.4         | 31.7±21.1        | 133.1        |
| Japan                  | 9          | 5.2±7.3         | 38.6±16.8        | 200.7        |
| Malaysia               | 4          | 5.3±3.1         | 35.0±8.7         | 185.5        |
| Mongolia               | 1          | -               | -                | -            |
| New Zealand            | 27         | 5.8±2.4         | 72.3±29.9        | 419.3        |
| Philippines            | 10         | 5.4±3.7         | 29.0±13.7        | 156.6        |
| Singapore              | 7          | 4.4±4.0         | 38.6±24.3        | 169.8        |

|                      |             |                 |                  |              |
|----------------------|-------------|-----------------|------------------|--------------|
| South Korea          | 12          | 3.0±3.0         | 23.3±6.2         | 69.,9        |
| Taiwan               | 23          | 7.6±12.0        | 22.9±16.3        | 174.0        |
| <i>Regional Mean</i> | 263         | 5.0±5.6         | 42.4±24.4        | 212.0        |
| <b>Global Mean</b>   | <b>1082</b> | <b>8.5±10.8</b> | <b>47.0±29.7</b> | <b>399.5</b> |

- no response

Abbreviations: std=standard; min=minimum.
